# Supplementary material
Source: PubMed Central journal article supplement (PMC5988973)
Supplement: NIHMS960080-supplement-1.pdf [file NIHMS960080-supplement-1.pdf]

## Supplemental Data

| Gene            | Forward Primer                | Reverse Primer                 |
|-----------------|-------------------------------|--------------------------------|
| <i>Cd4</i>      | 5'-GGGCTGTGGCAGTGTCTACT-3'    | 5'-GACACAGCAGAGGATGCAGA-3'     |
| <i>Rorc</i>     | 5'-TCTACGCTATGAGGAAGGAAGGC-3' | 5'-GACTATGGAGGAGAAACAGGTCCC-3' |
| <i>Il21</i>     | 5'-GCTCCACAAGATGTAAAGGGGC-3'  | 5'-CCACGAGGTCAATGATGAATGTC-3'  |
| <i>Cd40lg</i>   | 5'-GTGAGGAGATGAGAAGGCAA-3'    | 5'-CACTGTAGAACGGATGCTGC-3'     |
| <i>Foxp3</i>    | 5'-AGAAGCTGGGAGCTATGCAG-3'    | 5'-TACTGGTGGCTACGATGCAG-3'     |
| <i>Ctla4</i>    | 5'-GGATCCTTGTGCGAGTTAGC-3'    | 5'-TCACATTCTGGCTCTGTTGG-3'     |
| <i>Aqp9</i>     | 5'-TGGGGATTTGAGGTCTTCAC-3'    | 5'-GTTTCGAGTGATGCATTTGGA-3'    |
| <i>Zbtb7b</i>   | 5'-TGCTTCCGCATGTGGATC-3'      | 5'-GTGAGAAGCCCTTTGCCTGT-3'     |
| <i>Ehmt2</i>    | 5'-TCATCCCTGTCCGGGTTTTTC-3'   | 5'-TCACCGTAGTCAAAGCCCA-3'      |
| <i>Ehmt1</i>    | 5'-AAGCAAGAGACCAAGCAGGA-3'    | 5'-TGTGGAACCTTCATCAGCAG-3'     |
| <i>Cd8a</i>     | 5'-CACAGGAGCCGAAAGCGT-3'      | 5'-GGGCTTGCCTTCCTGTCTG-3'      |
| <i>Rora</i>     | 5'-CGCATTGATGGATTTATGGAG-3'   | 5'-TCGCATACTTCCCGTCAAAG-3'     |
| <i>Kdm1a</i>    | 5'-TGGGATGGATGTCACACTTC-3'    | 5'-CTCGTCCACCTACTCGATCC-3'     |
| <i>Kdm1b</i>    | 5'-GAGTATGCTTGTGGCAGCAG-3'    | 5'-GGGTATGGTCACCAGCAAAC-3'     |
| <i>Kdm3a</i>    | 5'-TGTCGACTATTGAGCCACACA-3'   | 5'-TCCTTTGACAGCTCGTTTCC-3'     |
| <i>Kdm3b</i>    | 5'-TGGAAGGCTCACTTGTTTGG-3'    | 5'-GGTATTCAACTGGCACCACAG-3'    |
| <i>Kdm4c</i>    | 5'-ATGGATTGACTACGGCAAGG-3'    | 5'-CCATGTCATTCCGACAAGTG-3'     |
| <i>Kdm7a</i>    | 5'-CAGCTCTACACGGCTCTTCC-3'    | 5'-ACAGGTTTGGAGCCATCATC-3'     |
| <i>Phf8</i>     | 5'-GTGTGACATGTGCCAGGACT-3'    | 5'-TCCTCCTCAACACCAACACA-3'     |
| <i>Setdb1</i>   | 5'-CACAAAGGCACCCTTATTGC-3'    | 5'-CGGGAGGGTGGTAATCATAG-3'     |
| <i>Suv39h1</i>  | 5'-AGGGGAGGAAGAAGTGGAAC-3'    | 5'-CAGGTCCTGCAGTTGATTCC-3'     |
| <i>Prdm2</i>    | 5'-CTCCACCTCTGCAAACATGA-3'    | 5'-ACTGCATCCTGGCTTACCAC-3'     |
| <i>18S rRNA</i> | 5'-CGGCTACCACATCCAAGGAA-3'    | 5'-GCTGGAATTACCGCGGCT-3'       |

**Supplemental Table 1. Sequences of primers used for quantitative PCR.**

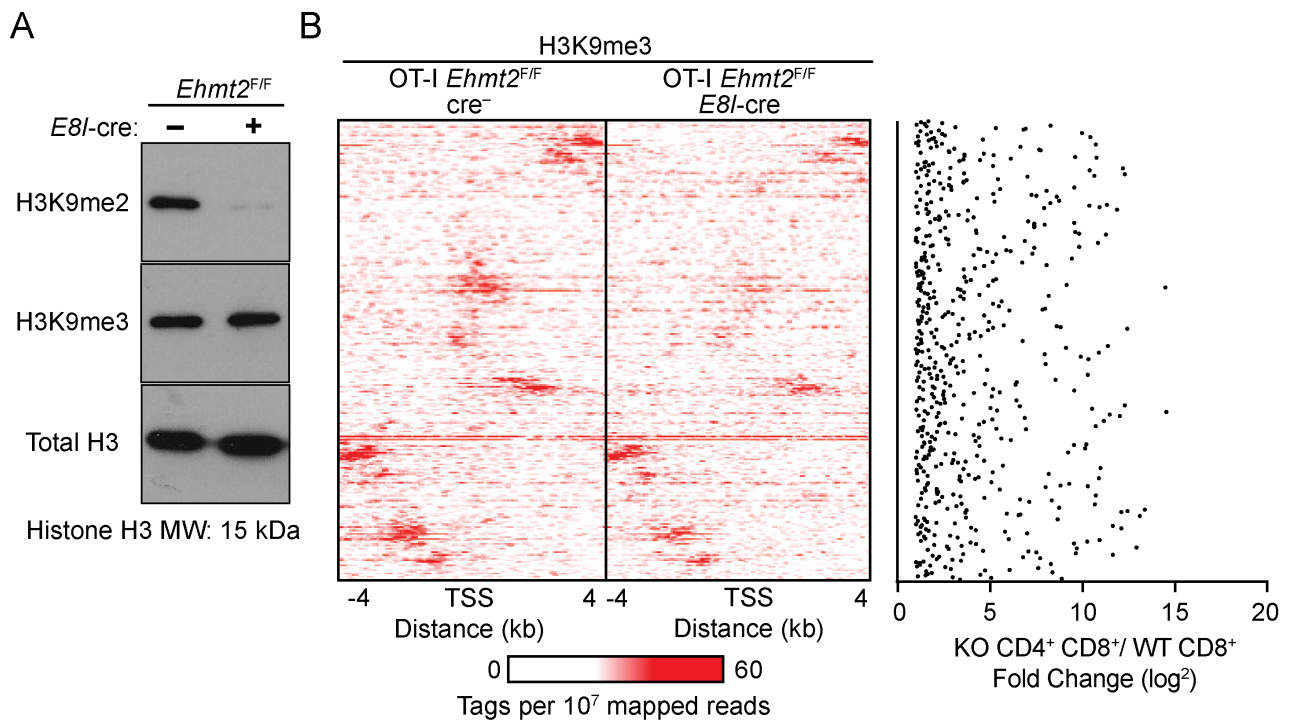

**Supplemental Figure 1. De-repression of the helper lineage-associated genes in *Ehmt2<sup>-/-</sup>* cells is independent of H3K9 trimethylation.**

(A) Western blots showing amounts of H3K9me2, H3K9me3 or total H3 in CD8 T cells from *Ehmt2<sup>F/F</sup> Cd8-E8I-cre* mice and control *Ehmt2<sup>F/F</sup> cre<sup>-</sup>* mice. Data are representative of two experiments. (B) A heat map displaying the distribution of H3K9me3 ChIP-seq tags at the 637 genes that were identified from the RNA-sequencing data with at least a 2-fold higher expression in the CD4<sup>+</sup> CD8<sup>+</sup> *Ehmt2<sup>F/F</sup> Cd4-cre* mice compared to CD8<sup>+</sup> cells from control *Ehmt2<sup>F/F</sup> cre<sup>-</sup>* in Fig. 2C. Fold-changes of expression of those genes are plotted on the right panel.
